# Supplementary material
Source: publisher figshare collection journal article supplement (https://geolsoc.figshare.com/ndownloader/files/9880681)
Supplement: Supplementary file 1 [file 9880681]

## Sheet: Machine 1 (Nina)
		Sample		d13C	d18O	raw d47	raw D47	raw d48	raw D48	raw d49	raw D49		D48 Offset	Heated Gas	Heated Gas	Linearity corrected D47	ETF	ETF	D47, ‰	Acid Fractionation	D47 acid, ‰
Type	Date	Identifier	Mineralogy	‰, PDB	‰, PDB footnote needed	‰, WG#	‰, WG#	‰, WG#	‰, WG#	‰, WG#	‰, WG#	49 Parameter	‰, HG@	Slope§	Intercept§	‰, WG#	Slope¥	Intercept¥	CDES&	Factor, ‰	CDES&
Heated Gas Line 16/04/13 to 27/06/13
Heated Gas	2013-04-16	HGS_-33	CO2	-36.85	-6.84825	-34.672	-1.371	-3.326	-0.926	-0.93	35.874	0.022	-0.284346	0.0165688	-0.812401		1.1033	0.923528
Carbonate Standard	2013-04-16	Carrara Marble	Calcite	1.95	-2.3669	16.916	-0.284	33.402	9.975	-9.451	-37.295	0.223	1.5665	0.0165688	-0.812401	-0.564277	1.1033	0.923528	0.300963	0.069	0.369963
Heated Gas	2013-04-17	HGS_-33	CO2	-36.85	-6.82885	-34.675	-1.391	-3.154	-0.794	-1.207	35.547	0.029	-0.193385	0.0165688	-0.812401		1.1033	0.923528
Heated Gas	2013-04-17	HGS_+24	CO2	3.84	8.86587	21.778	-0.498	38.082	8.275	-2.968	-38.806	0.069	-0.963286	0.0165688	-0.812401		1.1033	0.923528
Carbonate Standard	2013-04-17	Carrara Marble	Calcite	1.96	-2.47274	16.857	-0.25	33.487	10.27	-10.59	-38.214	0.249	1.84101	0.0165688	-0.812401	-0.5293	1.1033	0.923528	0.339553	0.069	0.408553
Heated Gas	2013-04-18	HGS_-9	CO2	-3.31	-14.909	-10.017	-0.936	-24.088	-5.821	-3.508	14.84	0.082	-0.225537	0.0165688	-0.812401		1.1033	0.923528
Heated Gas	2013-04-18	HGS_-9	CO2	-3.31	-14.8993	-10.016	-0.942	-23.741	-5.483	-3.476	14.857	0.08	0.0296687	0.0165688	-0.812401		1.1033	0.923528
Heated Gas	2013-04-19	HGS_+8	CO2	-5.5	2.93912	6.318	-0.714	22.751	5.179	-4.307	-19.6	0.1	-0.401312	0.0165688	-0.812401		1.1033	0.923528
Carbonate Standard	2013-04-20	Carrara Marble	Calcite	2.01	-2.28992	17.066	-0.278	31.792	8.249	-6.361	-34.502	0.144	0.22864	0.0165688	-0.812401	-0.560762	1.1033	0.923528	0.30484	0.069	0.37384
Equilibrated Gas	2013-04-22	EQS-25C	CO2	-36.69	18.2361	-8.478	-0.14	63.291	14.032	-2.407	-16.149	0.056	-1.58219	0.0165688	-0.812401	0.000469908	1.1033	0.923528
Sample	2013-04-22	JM3705	Dolomite	3.25	-6.1485	15.559	-0.195	23.462	5.533	-10.82	-38.564	0.17	-0.47915	0.0165688	-0.812401	-0.452793	1.1033	0.923528	0.423962	0.069	0.492962
Heated Gas	2013-04-26	HGS_+17	CO2	1.72775	-2.41823	7.87353	-0.703616	9.66451	2.96916	0	-1046.68	0.0183748	0.511277	0.0165688	-0.812401		1.1033	0.923528
Heated Gas	2013-04-29	HGS_CM	CO2	1.73	-1.65871	8.692	-0.677	10.996	2.775	-2.942	-16.326	0.067	-0.000571971	0.0165688	-0.812401		1.1033	0.923528
Equilibrated Gas	2013-05-03	EQS-80C	CO2	-36.72	11.3006	-15.698	-0.464	44.944	10.238	-1.085	-1.258	0.024	-0.953065	0.0165688	-0.812401	-0.203904	1.1033	0.923528
Sample	2013-05-03	JM2923	Dolomite	2.74	-7.9457	13.181	-0.21	19.739	5.504	-9.612	-26.87	0.229	0.389397	0.0165688	-0.812401	-0.428393	1.1033	0.923528	0.450883	0.069	0.519883
Sample	2013-05-03	JM3705	Dolomite	2.99	-6.69631	14.72	-0.206	22.713	5.915	-7.613	-19.614	0.107	0.0834201	0.0165688	-0.812401	-0.449892	1.1033	0.923528	0.427163	0.069	0.496163
Heated Gas	2013-05-06	HGS_-2	CO2	-12.1	-3.65693	-7.03	-0.908	6.287	2.164	-2.347	2.047	0.051	0.511994	0.0165688	-0.812401		1.1033	0.923528
Equilibrated Gas	2013-05-07	EQS-50C	CO2	-36.69	15.879	-10.952	-0.287	56.619	12.335	-1.191	-10.387	0.025	-1.67069	0.0165688	-0.812401	-0.105539	1.1033	0.923528
Sample	2013-05-07	JM3637	Dolomite	3.12	-5.53341	16.105	-0.159	25.416	6.209			0.147	-0.274224	0.0165688	-0.812401	-0.42584	1.1033	0.923528	0.4537	0.069	0.5227
Equilibrated Gas	2013-05-13	EQS-80C	CO2	-36.7	11.8729	-15.129	-0.485	45.69	9.807	0.964	-0.369	-0.021	-1.56391	0.0165688	-0.812401	-0.234331	1.1033	0.923528
Sample	2013-05-13	JM3637	Dolomite	2.88	-6.00434	15.405	-0.142	24.943	6.698			0.289	0.328808	0.0165688	-0.812401	-0.397242	1.1033	0.923528	0.485252	0.069	0.554252
Carbonate Standard	2013-05-14	Carrara Marble	Calcite	2.05	-2.1937	17.175	-0.303	32.388	8.638	-2.389	-30.864	0.054	0.473955	0.0165688	-0.812401	-0.587568	1.1033	0.923528	0.275265	0.069	0.344265
Heated Gas	2013-05-16	HGS	CO2	1.16	-4.12253	5.576	-0.711	5.175	1.929	-15.211	-23.069	0.349	0.542317	0.0165688	-0.812401		1.1033	0.923528
Heated Gas	2013-05-19	HGS	CO2	-36.75	-21.4275	-49.251	-1.641	-40.194	-9.036	4.212	72.343	-0.095	0.402351	0.0165688	-0.812401		1.1033	0.923528
Heated Gas	2013-05-20	HGS	CO2	-36.7	-21.2432	-48.99	-1.61	-39.941	-9.155	4.605	72.298	-0.104	0.222985	0.0165688	-0.812401		1.1033	0.923528
Heated Gas	2013-05-22	HGS_+14	CO2	2.44462	-1.5371	9.50715	-0.672575	11.2684	2.78892	0	-1046.96	0.0221659	-0.0516409	0.0165688	-0.812401		1.1033	0.923528
Heated Gas	2013-05-24	HGS_+10	CO2	2.76	-5.32534	5.924	-0.681	2.383	1.562	-13.44	-20.507	0.309	0.841488	0.0165688	-0.812401		1.1033	0.923528
Carbonate Standard	2013-05-26	Carrara Marble	Calcite	2.13	-2.00127	17.489	-0.277	31.333	7.206	-4.572	-33.449	0.105	-0.703704	0.0165688	-0.812401	-0.566771	1.1033	0.923528	0.298211	0.069	0.367211
Carbonate Standard	2013-05-27	Carrara Marble	Calcite	2.03	-2.23219	17.15	-0.272	31.18	7.529	-4.153	-32.488	0.098	-0.343818	0.0165688	-0.812401	-0.556154	1.1033	0.923528	0.309925	0.069	0.378925
Heated Gas	2013-05-29	HGS_-33	CO2	-36.79	-21.3887	-49.265	-1.656	-41.372	-10.336	-3.446	64.122	0.082	-0.616579	0.0165688	-0.812401		1.1033	0.923528
Heated Gas	2013-06-03	HGS_+10	CO2	-0.61	-3.96733	3.964	-0.764	4.994	1.436	-7.785	-14.272	0.181	0.0925039	0.0165688	-0.812401		1.1033	0.923528
Sample	2013-06-03	JM2923	Dolomite	2.87	-6.8693	13.181	-0.21	19.739	5.504	-9.451	-37.295	0.229	0.389397	0.0165688	-0.812401	-0.428393	1.1033	0.923528	0.519883	0.069	0.588883
Heated Gas	2013-06-05	HGS_+15	CO2	3.4	-0.417103	11.644	-0.627	14.315	3.564	-3.639	-21.084	0.086	-0.00348465	0.0165688	-0.812401		1.1033	0.923528
Heated Gas	2013-06-06	HGS_+14	CO2	1.06	-0.902107	8.853	-0.644	13.261	3.506	-8.614	-22.752	0.206	0.19	0.0165688	-0.812401		1.1033	0.923528
Carbonate Standard	2013-06-07	Carrara Marble	Calcite	2.11	-2.07824	17.394	-0.266	31.626	7.655	-6.592	-35.232	0.157	-0.32534	0.0165688	-0.812401	-0.554197	1.1033	0.923528	0.312084	0.069	0.381084
Carbonate Standard	2013-06-08	Carrara Marble	Calcite	2.11	-2.059	17.379	-0.304	30.611	6.62	-0.752	-29.606	0.018	-1.11564	0.0165688	-0.812401	-0.591948	1.1033	0.923528	0.270433	0.069	0.339433
Carbonate Standard	2013-06-14	ETH3	Calcite	1.60763	-2.10482	17.1558	0.00944144	31.6529	7.73766	0	-1050.67	0.0639992	-0.249159	0.0165688	-0.812401	-0.274809	1.1033	0.923528	0.620332	0.069	0.689332
Carbonate Standard	2013-06-15	Carrara Marble	Calcite	2.05	-2.25144	17.164	-0.251	31.03	7.426	-2.102	-30.47	0.053	-0.410656	0.0165688	-0.812401	-0.535386	1.1033	0.923528	0.332838	0.069	0.401838
Carbonate Standard	2013-06-17	Carrara Marble	Calcite	1.99	-2.29954	17.051	-0.264	31.174	7.654	-6.663	-34.764	0.168	-0.217372	0.0165688	-0.812401	-0.546514	1.1033	0.923528	0.320561	0.069	0.389561
Carbonate Standard	2013-06-18	Carrara Marble	Calcite	1.99675	-2.26948	17.067	-0.283676	30.972	7.40292	0	-1051.74	0.0465097	-0.419759	0.0165688	-0.812401	-0.566455	1.1033	0.923528	0.29856	0.069	0.36756
Heated Gas	2013-06-20	HGS_Carrara	CO2	1.74	1.16401	11.665	-0.618	18.522	4.554	-9.825	-28.632	0.251	-0.0172739	0.0165688	-0.812401		1.1033	0.923528
Sample	2013-06-20	JM2848	Dolomite	3	-5.9755	15.545	-0.148	26.812	8.476	-6.658	-33.537	0.186	1.65623	0.0165688	-0.812401	-0.405561	1.1033	0.923528	0.476073	0.069	0.545073
Sample	2013-06-20	JM3637	Dolomite	3.17	-5.54302	16.167	-0.146	25.914	6.711	-4.543	-15.031	0.12	0.107718	0.0165688	-0.812401	-0.413867	1.1033	0.923528	0.46691	0.069	0.53591
Sample	2013-06-20	JM2923	Dolomite	3.02	-7.5036	13.95	-0.167	20.725	5.584	-4.572	-33.449	0.103	0.23169	0.0165688	-0.812401	-0.398134	1.1033	0.923528	0.484268	0.069	0.553268
Carbonate Standard	2013-06-22	Carrara Marble	Calcite	2.03	-2.18408	17.209	-0.258	31.756	7.996	-1.927	-30.415	0.05	-0.015681	0.0165688	-0.812401	-0.543132	1.1033	0.923528	0.324292	0.069	0.393292
Carbonate Standard	2013-06-24	Carrara Marble	Calcite	2.01	-2.22257	17.15	-0.265	31.59	7.915	-9.494	-37.678	0.244	-0.0566615	0.0165688	-0.812401	-0.549154	1.1033	0.923528	0.317648	0.069	0.386648
Heated Gas	2013-06-25	HGS_HP	CO2	-36.73	-21.2723	-49.092	-1.651	-41.051	-10.23	-1.496	65.895	0.038	-0.587169	0.0165688	-0.812401		1.1033	0.923528
Carbonate Standard	2013-06-26	ETH3	Calcite	1.25	-3.00194	15.881	0.016	30.131	8.053	-4.786	-30.861	0.125	0.68015	0.0165688	-0.812401	-0.279623	1.1033	0.923528	0.641826	0.069	0.710826
Heated Gas Line 28/06/13 to 15/07/13
Heated Gas	2013-06-28	HGS_CM		1.857	0.434078	10.9921	-0.647719	16.4256	3.94202	0	-1054.56	-0.00229456	-0.122435	0.0186149	-0.84075		1.08143	0.94422
Carbonate Standard	2013-06-30	ETH3		1.4	-2.69404	16.347	0.022	30.197	7.51	-1.402	-28.299	0.037	0.120917	0.0186149	-0.84075	-0.282298	1.08143	0.94422	0.638934	0.069	0.707934
Heated Gas	2013-07-01	HGS		0.409	1.88557	11.0825	-0.642805	20.476	5.03374	0	-1055.48	0.013797	-0.0325097	0.0186149	-0.84075		1.08143	0.94422
Heated Gas	2013-07-02	HGS_+11		0.67	-1.67811	7.631	-0.686	10.899	2.722	-5.179	-17.457	0.142	0.0244394	0.0186149	-0.84075		1.08143	0.94422
Carbonate Standard	2013-07-02	ETH3		1.32	-2.8961	16.058	0.021	29.539	7.271	0.07	-26.395	-0.002	0.0437547	0.0186149	-0.84075	-0.277918	1.08143	0.94422	0.64367	0.069	0.71267
Carbonate Standard	2013-07-04	ETH3		1.77	-1.8377	17.62	0.038	33.88	9.37	-6.25	-35.041	0.17	1.07507	0.0186149	-0.84075	-0.289995	1.08143	0.94422	0.630611	0.069	0.699611
Sample	2013-07-04	JM3318		3.49	-4.83183	17.232	-0.13	29.77	9.058	-6.658	-33.537	0.181	1.77394	0.0186149	-0.84075	-0.450772	1.08143	0.94422	0.456741	0.069	0.525741
Heated Gas	2013-07-05	HGS_CM		2.09	1.72661	12.577	-0.622	20.213	5.088	-0.567	-20.99	0.015	0.0868126	0.0186149	-0.84075		1.08143	0.94422
Carbonate Standard	2013-07-06	Carrara Marble		2.12	-2.04938	17.43	-0.274	31.705	7.669	-1.535	-30.395	0.042	-0.090981	0.0186149	-0.84075	-0.598458	1.08143	0.94422	0.297029	0.069	0.366029
Carbonate Standard	2013-07-07	ETH3		1.71	-1.9724	17.411	0.029	32.053	7.861	-1.778	-30.376	0.048	0.0154271	0.0186149	-0.84075	-0.295104	1.08143	0.94422	0.625085	0.069	0.694085
Heated Gas	2013-07-08	HGS_+11		1.05	-2.78392	6.874	-0.681	8.159	2.204	-4.543	-15.031	0.124	0.184122	0.0186149	-0.84075		1.08143	0.94422
Heated Gas	2013-07-10	HGS_+11		6.20025	-6.74276	7.74475	-0.695653	-2.67442	-0.671064	0	-1058.19	-0.00593016	-0.0115185	0.0186149	-0.84075		1.08143	0.94422
Heated Gas	2013-07-15	HGS_-4		-14.6215	-3.09372	-8.96626	-1.01776	6.80645	1.55644	0	-1064.41	-0.0593161	-0.128911	0.0186149	-0.84075		1.08143	0.94422
Note: Sample unknowns for this study are highlighted as green rows. All other rows contain data for the equilibrium reference gases used to normalize data and carbonate standards used to monitor accuracy and precision.
#WG: working gas. These are raw values relative to a Oztech reference gas with d13C = -3.61‰ (PDB) and d18O = 25.01‰ (SMOW).
§Time varying slope and intercept of the 'heated gas line' (see Huntington et al., 2009 for heated gas line description) determined from average values until 21/01/14 and from a 30-day moving average from this point forward.
*D47 values relative to the 'Ghosh' scale (Ghosh et al., 2006; described by Huntington et al., 2009)
**D47 values scaled to a 25 °C phosphoric acid reaction by addition of a 0.067‰ temperature correction factor for 90 °C reactions (Wacker et al., 2013).
@D48 values normalized to a time varying D48 heated gas line. Large values (> ±2‰) indicate potential sample contamination, or other problems during analysis.
¥Time varying slope and intercept of the 'equilibrated gas line' (see Dennis et al., 2011 for equilibrated gas line description).
&D47 values reported in the 'carbon dioxied equilibrium scale' based on theoretical equilibrium values of CO2 (see Dennis et al., 2011).

## Sheet: Machine 2 (Pinta)
		Sample		d13C	d18O	raw d47	raw D47	raw d48	raw D48	raw d49	raw D49		D48 Offset	Heated Gas	Heated Gas	Linearity corrected D47	ETF	ETF	D47, ‰	Acid Fractionation	D47 acid, ‰
Type	Date	Identifier	Mineralogy	‰, PDB	‰, PDB	‰, WG#	‰, WG#	‰, WG#	‰, WG#	‰, WG#	‰, WG#	49 Parameter	‰, HG@	Slope§	Intercept§	‰, WG#	Slope¥	Intercept¥	CDES&	Factor, ‰	CDES&
Heated Gas Line 09/05/13 to 28/07/13
Heated Gas	2013-05-10	HGS +10	CO2	6.29	-8.03166	6.332	-0.828	-4.831	-0.108	154.897	149.002	0.238	-0.142175	0.00187129	-0.843518		1.11845	0.976903
Carbonate Standard	2013-05-17	Carrara Marble	Calcite	1.98	-2.32841	16.596	-0.588	23.504	0.367	-623.035	-633.621	0.087	-0.362561	0.00187129	-0.843518	-0.619056	1.11845	0.976903	0.28452	0.069	0.35352
Heated Gas	2013-05-22	HGS_-33	CO2	-36.91	-21.5245	-48.907	-0.932	-32.476	-0.728	96.948	171.982	-0.081	-0.0837233	0.00187129	-0.843518		1.11845	0.976903
Heated Gas	2013-05-24	HGS_-33	CO2	-36.59	-20.9716	-47.954	-0.904	-31.004	-0.471	49.424	119.409	-0.044	0.137151	0.00187129	-0.843518		1.11845	0.976903
Equilibrated Gas	2013-05-25	EQS-50C	CO2	3.1	20.4284	33.271	-0.109	53.521	0.369	-95.072	-146.504	0.101	1.11236	0.00187129	-0.843518	-0.17126	1.11845	0.976903
Carbonate Standard	2013-05-26	Carrara Marble	Calcite	2.13	-1.99165	17.119	-0.562	23.802	-0.02	-77.149	-103.794	0.066	-0.756874	0.00187129	-0.843518	-0.594035	1.11845	0.976903	0.312505	0.069	0.381505
Carbonate Standard	2013-05-26	Carrara Marble	Calcite	2.05	-2.11673	16.873	-0.598	23.453	-0.105	-1.425	-29.932	0.002	-0.833309	0.00187129	-0.843518	-0.629574	1.11845	0.976903	0.272755	0.069	0.341755
Carbonate Standard	2013-05-27	Carrara Marble	Calcite	2.03	-2.21295	16.77	-0.588	23.349	-0.029	8.375	-20.216	-0.015	-0.754757	0.00187129	-0.843518	-0.619382	1.11845	0.976903	0.284155	0.069	0.353155
Equilibrated Gas	2013-05-27	EQS-80C	CO2	-36.98	14.1815	-12.985	-0.267	40.581	0.459	-14.879	-20.228	0.026	1.22658	0.00187129	-0.843518	-0.242701	1.11845	0.976903
Heated Gas	2013-05-28	HGS -33	CO2	-36.91	-21.4372	-48.807	-0.927	-32.138	-0.56	-52.589	12.024	0.069	0.0759816	0.00187129	-0.843518		1.11845	0.976903
Sample	2013-05-28	JM2848	Dolomite	2.79	-6.42721	14.513	-0.417	17.75	0.63		-77.946	0.112	0.0416513	0.00187129	-0.843518	-0.444158	1.11845	0.976903	0.480134	0.069	0.549134
Carbonate Standard	2013-05-30	Carrara Marble	Calcite	2.14	-1.98202	17.158	-0.544	24.766	0.905	-208.824	-231.688	0.359	0.144468	0.00187129	-0.843518	-0.576108	1.11845	0.976903		0.069	0.401555
Equilibrated Gas	2013-05-30	EQS-80C	CO2	-37.09	11.2909	-15.964	-0.283	34.765	0.545	22.492	22.863	-0.036	1.32346	0.00187129	-0.843518	-0.253127	1.11845	0.976903
Heated Gas	2013-06-25	HGS_-33	CO2	-36.84	-21.3402	-48.653	-0.93	-32.104	-0.726	34.506	104.766	-0.056	-0.0908528	0.00187129	-0.843518		1.11845	0.976903
Heated Gas	2013-06-25	HGS_+13	CO2	3.39	-3.81213	7.89	-0.803	3.863	0.118	-115.021	-124.456	0.189	-0.12954	0.00187129	-0.843518		1.11845	0.976903
Heated Gas	2013-06-25	HGS_HP	CO2	-36.84	-21.3402	-48.653	-0.93	-32.104	-0.726	34.506	104.766	-0.056	-0.0908528	0.00187129	-0.843518		1.11845	0.976903
Carbonate Standard	2013-06-29	Carrara Marble	Calcite	1.84	-2.68442	16.139	-0.541	22.737	0.325	-60.705	-86.294	0.13	-0.385738	0.00187129	-0.843518	-0.571201	1.11845	0.976903	0.338043	0.069	0.407043
Heated Gas	2013-07-03	HGS_+11	CO2	0.75	-1.44531	7.73	-0.826	8.433	-0.054	-103.254	-114.677	0.242	-0.413695	0.00187129	-0.843518		1.11845	0.976903
Heated Gas	2013-07-05	HGS_CM	CO2	2.07	1.71691	12.245	-0.851	14.991	0.088	-35.522	-55.069	0.082	-0.432638	0.00187129	-0.843518		1.11845	0.976903
Carbonate Standard	2013-07-06	Carrara Marble	Calcite	2.11	-2.06862	17.014	-0.574	24.035	0.35	-31.992	-59.789	0.078	-0.392593	0.00187129	-0.843518	-0.605838	1.11845	0.976903	0.299303	0.069	0.368303
Heated Gas	2013-07-12	HGS_HP	CO2	-36.87	-21.3111	-48.701	-0.986	-31.995	-0.668	29.901	99.812	-0.058	-0.0355278	0.00187129	-0.843518		1.11845	0.976903
Carbonate Standard	2013-07-19	Carrara Marble	Calcite	2.08925	-2.0246	17.014	-0.581628	23.7747	0.0164417	0	-6.61324	0.0217441	-0.719763	0.00187129	-0.843518	-0.613466	1.11845	0.976903	0.290772	0.069	0.359772
Carbonate Standard	2013-07-19	ETH3	Calcite	1.75	-1.81845	17.212	-0.29	24.387	0.197	-15.681	-44.082	0.025	-0.554231	0.00187129	-0.843518	-0.322209	1.11845	0.976903	0.616528	0.069	0.685528
Carbonate Standard	2013-07-19	ETH3	Calcite	1.62	-2.15522	16.732	-0.279	23.681	0.196	-7.676	-35.514	0.018	-0.537905	0.00187129	-0.843518	-0.31031	1.11845	0.976903	0.629836	0.069	0.698836
Carbonate Standard	2013-07-19	ETH3	Calcite	1.69	-1.90505	17.065	-0.279	24.211	0.209	-9.461	-37.805	0.022	-0.537912	0.00187129	-0.843518	-0.310934	1.11845	0.976903	0.629139	0.069	0.698139
Carbonate Standard	2013-07-20	ETH3	Calcite	1.74	-1.79921	17.216	-0.292	24.673	0.437	-61.793	-88.888	0.106	-0.32125	0.00187129	-0.843518	-0.324216	1.11845	0.976903	0.614283	0.069	0.683283
Carbonate Standard	2013-07-23	Carrara Marble	Calcite	2.15	-1.86656	17.271	-0.565	24.685	0.579	-93.129	-119.561	0.141	-0.179545	0.00187129	-0.843518	-0.597319	1.11845	0.976903	0.308831	0.069	0.377831
Heated Gas Line 29/07/13 to 09/09/13
Heated Gas	2013-07-31	HGS+20	CO2	0.93	1.50351	10.918	-0.845	14.285	-0.17	32.187	12.854	0.059	-0.696696	0.00203748	-0.868467		1.08493	0.966857
Heated Gas	2013-07-31	HGS-33	CO2	-36.85	-21.4663	-48.811	-0.958	-32.472	-0.84	-700.287	-679.854	-0.097	-0.680579	0.00203748	-0.868467		1.08493	0.966857
Carbonate Standard	2013-08-01	ETH3	Calcite	1.76	-1.70299	17.362	-0.258	24.887	0.465	399.985	359.284	0.182	0.416882	0.00203748	-0.868467	-0.293375	1.08493	0.966857	0.648565	0.069	0.717565
Heated Gas	2013-08-01	HGS-33	CO2	-36.95	-21.7088	-49.132	-0.942	-32.938	-0.823	-98.887	-36.848	-0.085	-0.989259	0.00203748	-0.868467		1.08493	0.966857
Heated Gas	2013-08-03	HGS_+18	CO2	2.39	0.339503	11.166	-0.824	12.163	0.061	166.016	145.177	0.208	0.556558	0.00203748	-0.868467		1.08493	0.966857
Carbonate Standard	2013-08-04	Carrara Marble	Calcite	1.82	-2.61707	16.18	-0.551	23.215	0.651	-314.829	-333.574	0.233	0.627417	0.00203748	-0.868467	-0.583966	1.08493	0.966857	0.333293	0.069	0.402293
Heated Gas	2013-08-05	HGS+18	CO2	3.04	0.601405	12.014	-0.881	11.97	-0.665	4919.41	4806.75	-0.164	-1.15773	0.00203748	-0.868467		1.08493	0.966857
Carbonate Standard	2013-08-06	Carrara Marble	Calcite	1.99	-2.45349	16.503	-0.563	23.261	0.372	-104.993	-129.909	0.12	0.347742	0.00203748	-0.868467	-0.596625	1.08493	0.966857	0.31956	0.069	0.38856
Sample	2013-08-06	JM3318	Dolomite	3	-5.90823	15.308	-0.364	18.997	0.801	-568.692	-579.183	0.488	0.839312	0.00203748	-0.868467	-0.39519	1.08493	0.966857	0.538103	0.069	0.607103
Sample	2013-08-06	JM3318	Dolomite	3	-6.02356	15.199	-0.358	18.912	0.945	-254.005	-271.988	0.388	0.98456	0.00203748	-0.868467	-0.388968	1.08493	0.966857	0.544853	0.069	0.613853
Heated Gas	2013-08-07	HGS+18	CO2	6.86	-7.60486	7.279	-0.866	-4.296	-0.42	-9.127	-15.578	0.015	-0.674036	0.00203748	-0.868467		1.08493	0.966857
Carbonate Standard	2013-08-10	Carrara Marble	Calcite	2.17	-2.27068	16.853	-0.573	23.493	0.24	-99.552	-125.09	0.093	0.212338	0.00203748	-0.868467	-0.607338	1.08493	0.966857	0.307937	0.069	0.376937
Carbonate Standard	2013-08-11	ETH3	Calcite	1.8	-1.77996	17.295	-0.288	24.448	0.181	21.31	-8.277	-0.008	0.139324	0.00203748	-0.868467	-0.323238	1.08493	0.966857	0.616165	0.069	0.685165
Carbonate Standard	2013-08-13	Carrara Marble	Calcite	2	-2.04938	16.923	-0.572	23.919	0.212	-22.177	-50.177	0.055	0.178087	0.00203748	-0.868467	-0.60648	1.08493	0.966857	0.308867	0.069	0.377867
Heated Gas	2013-08-14	HG-33	CO2	-36.87	-21.4275	-48.789	-0.959	-31.948	-0.39	-42.652	22.573	0.07	-0.238268	0.00203748	-0.868467		1.08493	0.966857
Heated Gas	2013-08-19	HGS_+11	CO2	6.58	-6.33415	8.328	-0.861	-1.538	-0.211	-32.386	-40.879	0.056	0.0835076	0.00203748	-0.868467		1.08493	0.966857
Heated Gas	2013-08-21	HG_+10	CO2	6.03	-6.16925	7.961	-0.858	-1.132	-0.134	-10.848	-19.314	0.031	0.166465	0.00203748	-0.868467		1.08493	0.966857
Heated Gas	2013-09-02	HGS_-33	CO2	-36.94	-21.7864	-49.268	-1.011	-33.443	-1.189	209.589	293.061	-0.27	-1.01533	0.00203748	-0.868467		1.08493	0.966857
Carbonate Standard	2013-09-07	Carrara Marble	Calcite	1.94	-2.30917	16.598	-0.573	23.224	0.043	-3.554	-31.533	0.01	0.019285	0.00203748	-0.868467	-0.606818	1.08493	0.966857	0.308501	0.069	0.377501
Heated Gas	2013-09-08	HGS +18	CO2	1.7	2.77422	12.997	-0.826	17.115	0.076	-67.845	-88.327	0.15	0.644224	0.00203748	-0.868467		1.08493	0.966857
Heated Gas	2013-09-09	HGS_+12	CO2	2.61	4.04493	15.202	-0.815	19.601	-0.019	-32.551	-57.056	0.07	0.585704	0.00203748	-0.868467		1.08493	0.966857
Heated Gas Line 25/04/14 to 29/08/14
Heated Gas	2014-04-25	HGS_HP	CO2	-36.87	-21.3305	-48.749	-1.012	-31.701	-0.325	-32.057	33.694	-0.202	0.51993	0.00260429	-0.876735		1.07629	0.96816
Heated Gas	2014-04-27	HGS_ICM	CO2	2.15	6.19835	16.937	-0.837	24.081	0.097	383.636	343.467	0.192	0.00515086	0.00260429	-0.876735		1.07629	0.96816
Heated Gas	2014-04-27	HGS_HP	CO2	-36.93	-21.4954	-48.983	-1.023	-32.391	-0.705	-233.371	-180.967	-0.091	0.151517	0.00260429	-0.876735		1.07629	0.96816
Heated Gas	2014-04-27	HGS_ICM	CO2	2.15	6.14985	16.886	-0.847	24	0.106	791.288	739.416	0.245	0.0155111	0.00260429	-0.876735		1.07629	0.96816
Heated Gas	2014-04-27	HGS_HP	CO2	-36.87	-21.3984	-48.825	-1.018	-32.508	-1.019	-1044.61	-1047.64	-0.259	-0.160518	0.00260429	-0.876735		1.07629	0.96816
Carbonate Standard	2014-04-29	Carrara Marble	Calcite	2.07	-2.15522	16.867	-0.591	23.598	0.1	204.52	170.183	-0.135	0.0162621	0.00258176	0.000910254	-0.634547	1.07629	0.96816	0.285203	0.069	0.354203
Carbonate Standard	2014-04-29	ETH3	Calcite	1.75	-2.00127	17.038	-0.269	24.272	0.448	8.588	-20.151	-0.006	0.352943	0.00258176	0.000910254	-0.312988	1.07629	0.96816	0.631293	0.069	0.700293
Carbonate Standard	2014-04-30	Carrara Marble	Calcite	2.17	-1.85694	17.33	-0.533	24.875	0.759	-242.588	-264.686	0.338	0.653817	0.00257049	6.32372e-05	-0.577547	1.07467	0.967492	0.346821	0.069	0.415821
Heated Gas	2014-05-01	HGS_HP	CO2	-36.91	-21.5924	-49.052	-1.013	-32.834	-0.959	60.652	133.361	-0.112	-0.0601463	0.00255923	-0.880123		1.07467	0.967492
Heated Gas	2014-05-02	HGS_HP	CO2	-36.85	-21.9998	-49.363	-0.989	-33.553	-0.879	16.182	86.662	-0.032	0.032129	0.00255923	-0.880123		1.07467	0.967492
Heated Gas	2014-05-02	HGS_HP	CO2	-36.86	-21.864	-49.25	-0.986	-33.342	-0.923	4.742	74.165	-0.01	-0.0154733	0.00255923	-0.880123		1.07467	0.967492
Carbonate Standard	2014-05-06	Carrara Marble	Calcite	2.14	-1.8377	17.29	-0.565	24.416	0.259	-71.711	-98.808	0.138	0.180434	0.0025846	0.00370618	-0.609688	1.07528	0.969634	0.314052	0.069	0.383052
Carbonate Standard	2014-05-07	ETH3	Calcite	1.79	-1.70299	17.358	-0.29	25.161	0.731	-5.764	-34.697	0.011	0.639715	0.00259094	0.00399292	-0.334973	1.07528	0.969634	0.609445	0.069	0.678445
Heated Gas	2014-05-10	HGS_HP	CO2	-37	-22.1647	-49.69	-1.005	-34.046	-1.05	36.809	109.273	-0.065	-0.132943	0.00260996	-0.877829		1.06591	0.958326
Carbonate Standard	2014-05-12	Carrara Marble	Calcite	2.17	-1.70299	17.481	-0.544	24.784	0.353	-543.155	-556.646	0.239	0.303267	0.00259708	0.00277293	-0.5894	1.07333	0.963743	0.331122	0.069	0.400122
Carbonate Standard	2014-05-13	ETH3	Calcite	1.74	-1.77034	17.292	-0.249	24.991	0.69	-73.501	-100.312	0.213	0.636866	0.00259064	0.00285441	-0.293797	1.07705	0.966452	0.650019	0.069	0.719019
Heated Gas	2014-05-14	HGS+3	CO2	1	-9.27327	-0.128	-0.899	-7.911	-0.681	7.984	10.665	-0.022	-0.168228	0.0025842	-0.877503		1.08076	0.969161
Heated Gas	2014-05-15	HGS-9	CO2	-2.06	-16.1215	-10.055	-0.86	-21.658	-0.767	-69.149	-50.732	0.168	-0.015362	0.0025842	-0.877503		1.08076	0.969161
Carbonate Standard	2014-05-16	Carrara Marble	Calcite	2.06	-2.00127	17.041	-0.563	24.082	0.269	-38.95	-66.617	0.119	0.225866	0.00258478	0.00260996	-0.607047	1.07885	0.967559	0.312644	0.069	0.381644
Heated Gas	2014-05-19	HGS+17	CO2	1.63	0.261902	10.329	-0.839	11.946	-0.003	-45.967	-62.163	0.097	0.15612	0.00258649	-0.8774		1.07314	0.962754
Carbonate Standard	2014-05-20	Carrara Marble	Calcite	2.09	-2.24181	16.828	-0.554	23.583	0.272	-41.958	-69.112	0.125	0.226463	0.00257647	0.00242396	-0.597357	1.07375	0.96334	0.321928	0.069	0.390928
Heated Gas	2014-05-30	HGS_ICM	CO2	2.15	5.78124	16.494	-0.854	23.111	-0.019	-235.336	-256.928	0.256	-0.0503436	0.00247626	-0.879188		1.07375	0.96334
Heated Gas	2014-05-30	HGS_HP	CO2	-36.89	-21.5051	-48.95	-1.016	-32.885	-1.189	72.85	146.169	-0.125	-0.116004	0.00247626	-0.879188		1.07375	0.96334
Carbonate Standard	2014-06-01	Carrara Marble	Calcite	2.13	-1.84732	17.25	-0.582	24.384	0.26	26.334	-3.588	-0.048	0.203551	0.00239325	0.000965192	-0.623284	1.07375	0.96334	0.29409	0.069	0.36309
Carbonate Standard	2014-06-01	ETH3	Calcite	1.69	-2.03013	16.939	-0.278	24.29	0.534	-67.385	-93.846	0.094	0.479404	0.00239325	0.000965192	-0.318539	1.07375	0.96334	0.621309	0.069	0.690309
Heated Gas	2014-06-02	HGS_ICM	CO2	2.18	5.84914	16.581	-0.868	23.131	-0.149	-43.297	-70.472	0.057	-0.160204	0.00235175	-0.881455		1.07366	0.966384
Carbonate Standard	2014-06-03	Carrara Marble	Calcite	2.12	-2.24181	16.858	-0.557	23.82	0.5	-157.882	-181.779	0.253	0.474743	0.00234542	0.00207922	-0.596539	1.07316	0.966313	0.326132	0.069	0.395132
Carbonate Standard	2014-06-05	ETH3	Calcite	1.85	-1.33736	17.859	-0.24	25.911	0.718	-73.674	-101.36	0.09	0.650096	0.00233275	0.00153415	-0.281661	1.07217	0.966173	0.664186	0.069	0.733186
Heated Gas	2014-06-06	HGS_HP	CO2	2.13	5.86854	16.543	-0.88	23.029	-0.287	16.879	-11.997	-0.018	-0.291959	0.00232642	-0.882545		1.07167	0.966102
Carbonate Standard	2014-06-07	Carrara Marble	Calcite	2.18	-1.77996	17.433	-0.516	24.848	0.579	288.618	250.805	0.384	0.53709	0.00232127	0.00133224	-0.556467	1.07167	0.966102	0.369754	0.069	0.438754
Carbonate Standard	2014-06-08	ETH3	Calcite	1.75	-1.78959	17.267	-0.265	24.882	0.625	-150.322	-174.886	0.199	0.582399	0.00231612	0.000338049	-0.304992	1.07167	0.966102	0.639251	0.069	0.708251
Heated Gas	2014-06-09	HGS_ICM	CO2	2.18	5.73274	16.587	-0.741	23.421	0.371	4412.82	4260.37	0.32	0.372412	0.00231097	-0.885527		1.06423	0.962666
Carbonate Standard	2014-06-10	Carrara Marble	Calcite	2.15	-2.08786	17.066	-0.542	24.339	0.694	-228.547	-250.692	0.255	0.676318	0.00231676	0.00222972	-0.581538	1.06459	0.963111	0.344009	0.069	0.413009
Carbonate Standard	2014-06-11	ETH3	Calcite	1.77	-1.68375	17.331	-0.321	24.74	0.276	134.669	101.572	-0.184	0.249977	0.00232256	0.00214848	-0.361252	1.06496	0.963555	0.578836	0.069	0.647836
Heated Gas	2014-06-12	HGS-HP	CO2	-36.89	-21.573	-48.981	-0.991	-33.199	-1.386	117.487	193.999	-0.182	-0.208903	0.00232835	-0.885771		1.06533	0.964
Carbonate Standard	2014-06-16	Carrara Marble	Calcite	2.14	-1.81845	17.331	-0.546	24.587	0.396	-400.539	-418.054	0.297	0.373284	0.00234165	0.000808809	-0.586583	1.06953	0.96863	0.341263	0.069	0.410263
Carbonate Standard	2014-06-17	ETH3	Calcite	1.75	-1.8377	17.24	-0.242	24.873	0.708	-220.444	-242.91	0.304	0.679346	0.00234498	0.000428923	-0.282427	1.07058	0.969788	0.667427	0.069	0.736427
Heated Gas	2014-06-18	HGS_ICM	CO2	2.23	6.68335	17.525	-0.831	25.129	0.146	-478.793	-494.457	0.189	0.1099	0.00234831	-0.88805		1.07163	0.970946
Carbonate Standard	2014-06-19	Carrara Marble	Calcite	2.17	-1.93391	17.237	-0.549	24.103	0.149	-130.143	-155.398	0.168	0.135408	0.00235063	0.00231016	-0.589518	1.07163	0.970946	0.3392	0.069	0.4082
Heated Gas	2014-06-27	HGS_ICM	CO2	2.15	6.70275	17.423	-0.875	25.105	0.085	3.506	-26.623	-0.007	0.0453628	0.00236925	-0.888394		1.06666	0.967241
Heated Gas	2014-06-27	HGS_HP	CO2	-36.89	-21.6506	-49.081	-1.004	-33.259	-1.274	100.045	175.571	-0.234	0.0762033	0.00236925	-0.888394		1.06666	0.967241
Carbonate Standard	2014-06-27	Carrara Marble	Calcite	2.13	-1.92429	17.155	-0.597	24.136	0.158	7.012	-22.202	-0.016	0.141438	0.00236925	0.00236925	-0.637645	1.06666	0.967241	0.287093	0.069	0.356093
Carbonate Standard	2014-06-27	ETH3	Calcite	1.69	-1.85694	17.078	-0.316	24.415	0.315	37.072	7.302	-0.088	0.291794	0.00236925	0.00236925	-0.356462	1.06666	0.967241	0.587018	0.069	0.656018
Heated Gas	2014-06-30	HGS_ICM	CO2	2.07	6.79005	17.437	-0.872	25.072	-0.116	-34.107	-63.192	0.056	-0.128595	0.00231902	-0.887905		1.06666	0.967241
Carbonate Standard	2014-07-01	Carrara Marble	Calcite	2.06	-2.33803	16.707	-0.552	23.371	0.244	-89.829	-115.439	0.137	0.270064	0.00231081	0.00266257	-0.590607	1.06759	0.967685	0.337157	0.069	0.406157
Carbonate Standard	2014-07-02	ETH3	Calcite	1.69	-2.04938	16.936	-0.269	24.502	0.768	-132.001	-156.608	0.18	0.768359	0.0023026	0.00300612	-0.307997	1.06853	0.968128	0.639024	0.069	0.708024
Heated Gas	2014-07-04	HGS_HP	CO2	2.17	6.31475	17.054	-0.856	24.213	-0.004	-19.996	-48.691	0.045	0.045005	0.00228618	-0.886531		1.0704	0.969016
Carbonate Standard	2014-07-06	Carrara Marble	Calcite	2.19	-1.73186	17.425	-0.587	24.683	0.313	-57.231	-84.989	0.075	0.351404	0.00230076	0.00300665	-0.627091	1.07513	0.972955	0.29875	0.069	0.36775
Carbonate Standard	2014-07-07	ETH3	Calcite	1.76	-1.62601	17.417	-0.286	25.46	0.866	-99.375	-125.697	0.167	0.886879	0.00230805	0.00336689	-0.326199	1.0775	0.974925	0.623447	0.069	0.692447
Heated Gas	2014-07-08	HGS_ICM	CO2	2.12	6.29535	16.964	-0.879	24.037	-0.137	48.357	17.748	-0.113	-0.09155	0.00231534	-0.88509		1.07986	0.976895
Sample	2014-07-08	JM2739	Dolomite	3.11	-4.73092	16.706	-0.423	21.156	0.32	-64.077	-89.32	0.108	0.430803	0.00231534	-0.88509	-0.46168	1.07986	0.976898	0.547348	0.069	0.616348
Sample	2014-07-08	JM2055	Dolomite	3.2	-3.80829	17.797	-0.38	22.991	0.267	-37.322	-65.104	0.084	0.336178	0.00231534	-0.88509	-0.421206	1.07986	0.976898	0.591054	0.069	0.660054
Carbonate Standard	2014-07-09	Carrara Marble	Calcite	2.13	-2.00127	17.099	-0.57	24.174	0.367	-33.214	-61.106	0.055	0.409342	0.00233381	0.00322915	-0.609906	1.08281	0.978852	0.318441	0.069	0.387441
Sample	2014-07-09	JM2739	Dolomite	2.93	-4.95196	16.309	-0.409	21.284	0.894	-97.069	-120.868	0.151	1.0019	0.00233381	-0.884176	-0.447062	1.08281	0.978852	0.563769	0.069	0.632769
Sample	2014-07-09	JM2055	Dolomite	3.15	-3.77946	17.786	-0.378	22.965	0.172	-28.272	-56.334	0.067	0.241767	0.00233381	-0.884176	-0.419509	1.08281	0.978852	0.593604	0.069	0.662604
Carbonate Standard	2014-07-10	ETH3	Calcite	1.8	-1.65488	17.433	-0.282	24.888	0.365	-72.364	-99.463	0.097	0.391146	0.00235227	0.00414296	-0.323007	1.08575	0.980802	0.630096	0.069	0.699096
Heated Gas	2014-07-11	HGS_HP	CO2	-36.8	-21.4372	-48.775	-1.004	-32.71	-1.157	162.329	241.456	-0.216	0.174948	0.00237074	-0.882348		1.0887	0.982755
Sample	2014-07-11	JM2055	Dolomite	3.19	-3.51199	18.122	-0.381	23.565	0.179	0.734	-28.766	-0.002	0.21127	0.00237074	-0.882348	-0.423962	1.0887	0.982759	0.59019	0.069	0.65919
Sample	2014-07-11	JM2739	Dolomite	3.1	-4.91515	16.545	-0.409	20.874	0.358	-83.856	-108.275	0.18	0.452418	0.00237074	-0.882348	-0.448224	1.0887	0.982759	0.563777	0.069	0.632777
Carbonate Standard	2014-07-14	Carrara Marble	Calcite	2.16	-1.8858	17.252	-0.577	24.25	0.192	-53.819	-81.373	0.076	0.208449	0.00227493	-0.00236298	-0.616247	1.07974	0.980111	0.314726	0.069	0.383726
Carbonate Standard	2014-07-16	ETH3	Calcite	1.68	-1.92429	17.08	-0.314	24.511	0.405	-10.489	-38.896	0.011	0.415422	0.00221105	-0.00551878	-0.351765	1.07376	0.978349	0.600637	0.069	0.669637
Heated Gas	2014-07-17	HGS_ICM	CO2	2.15	6.25655	16.99	-0.848	24.136	0.03	-59.114	-86.549	0.092	0.0998141	0.00217911	-0.891816		1.0887	0.982755
Carbonate Standard	2014-07-19	ETH3	Calcite	1.68	-1.8858	17.071	-0.289	24.182	0.131	34.47	4.83	-0.044	0.199792	0.00219346	0.0019373	-0.326445	1.07974	0.980111	0.627637	0.069	0.696637
Heated Gas	2014-07-21	HGS_HP	CO2	-36.87	-21.6021	-49.013	-1.01	-33.639	-1.779	94.115	169.075	-0.2	-0.436089	0.00220782	-0.892299		1.07077	0.977467
Carbonate Standard	2014-07-24	Carrara Marble	Calcite	2.12	-1.96278	17.15	-0.559	24.145	0.249	-160.492	-184.779	0.181	0.318678	0.00220611	0.00212974	-0.596835	1.06699	0.973968	0.337153	0.069	0.406153
Carbonate Standard	2014-07-25	ETH3	Calcite	1.63	-2.45349	16.474	-0.245	23.428	0.538	-149.463	-172.846	0.208	0.623476	0.00220554	0.00210372	-0.281334	1.06573	0.972802	0.672977	0.069	0.741977
Heated Gas	2014-07-28	HGS_ICM	CO2	2.14	6.28565	17.02	-0.834	24.126	-0.036	-18.082	-46.752	0.103	0.0911154	0.00220383	-0.892481		1.06194	0.969303
Carbonate Standard	2014-07-29	Carrara Marble	Calcite	2.11	-1.86656	17.212	-0.578	24.071	-0.013	0.642	-28.474	-0.015	0.11527	0.00219527	0.00234564	-0.615785	1.06194	0.969303	0.315377	0.069	0.384377
Heated Gas	2014-07-30	Heated gas	CO2	-36.88	-21.476	-48.878	-0.984	-32.694	-1.056	60.673	133.073	-0.097	0.283269	0.00218671	-0.892198		1.06194	0.969303
Carbonate Standard	2014-07-31	ETH3	Calcite	1.72	-1.9724	17.018	-0.289	24.302	0.424	-13.232	-41.373	0.028	0.547081	0.00218021	0.00594813	-0.326103	1.06194	0.969303	0.623002	0.069	0.692002
Heated Gas	2014-08-01	Heated gas	CO2	2.12	3.82183	14.455	-0.845	18.501	-0.644	14.096	-10.656	-0.027	-0.478473	0.0021737	-0.884675		1.06194	0.969303
Carbonate Standard	2014-08-03	Carrara Marble	Calcite	2.12	-1.92429	17.171	-0.573	24.059	0.083	-12.248	-40.894	0.017	0.131016	0.00217826	0.00331037	-0.610403	1.0757	0.97495	0.31834	0.069	0.38734
Heated Gas Line 30/08/14 to 19/11/14
Heated Gas	2014-08-30	HGS_ICM	CO2	2.16	3.32713	14.106	-0.834	18.452	0.041	-25.715	-48.814	0.061	0.0712361	0.00216552	-0.878312
Heated Gas	2014-08-30	HGS_HP	CO2	-36.88	-21.2917	-48.583	-0.967	-32.036	-0.995	58.755	130.35	-0.133	0.00193257	0.00216552	-0.878312
Heated Gas	2014-08-30	HGS_ICM2	CO2	2.16	4.42323	15.238	-0.826	20.683	0.054	-28.521	-53.618	0.069	0.041519	0.00216552	-0.878312
Heated Gas	2014-08-30	HGS_HP2	CO2	2.22	3.08462	13.896	-0.855	17.883	-0.042	-24.27	-47.005	0.058	-0.000869237	0.00216552	-0.878312
Heated Gas	2014-09-01	HGS_HP	CO2	-36.93	-21.7185	-49.051	-0.966	-32.875	-0.996	-26.823	39.941	0.052	0.0169969	0.00216552	-0.878312
Carbonate Standard	2014-09-02	DGS_Carrara	Calcite	2.1	-2.13597	17.074	-0.524	23.964	0.179	-45.153	-72.624	0.106	0.103698	0.00218813	-0.878673	-0.56136	1.06226	0.953104	0.356791	0.069	0.425791
Heated Gas	2014-09-03	HGS_HP	CO2	-36.87	-21.5536	-48.853	-0.989	-32.479	-0.931	94.77	169.406	-0.084	0.0782068	0.00221074	-0.879033
Carbonate Standard	2014-09-03	DGS_ETH3	Calcite	1.68	-2.03975	17.036	-0.261	24.522	0.526	-77.493	-103.84	0.151	0.439843	0.00221074	-0.879033	-0.298662	1.06158	0.951187	0.635772	0.069	0.704772
Sample	2014-09-03	JM2848	Dolomite	2.8	-6.86889	13.897	-0.442	16.429	0.425	-229.666	-246.616	0.188	0.442755	0.00223984	-0.868193	-0.473127	1.05066	0.935957	0.507862	0.069	0.576862
Carbonate Standard	2014-09-05	DGS_Carrara	Calcite	2.11	-2.13597	17.04	-0.577	23.873	0.077	-0.101	-28.894	0	0.00331436	0.00222541	-0.878334	-0.614921	1.06109	0.95217	0.299681	0.069	0.368681
Carbonate Standard	2014-09-05	DGS_ETH3	Calcite	1.68	-2.27068	16.812	-0.243	24.224	0.699	-199.258	-221.768	0.182	0.618569	0.00222541	-0.878334	-0.280414	1.06109	0.951187	0.654625	0.069	0.723625
Sample	2014-09-05	JM3318	Dolomite	3.48	-4.59116	16.899	-0.467	20.796	0.137	8.137	-19.212	-0.017	0.0704202	0.00223984	-0.868193	-0.504851	1.05066	0.935957	0.474531	0.069	0.543531
Heated Gas	2014-09-08	HGS_ICM	CO2	2.19	5.59694	16.491	-0.814	23.192	0.16	-128.077	-152.618	0.122	0.10109	0.00224742	-0.877284
Sample	2014-09-08	JM3318	Dolomite	3.43	-4.72571	16.75	-0.438	20.791	0.387	-34.376	-60.288	0.066	0.320517	0.00223984	-0.868193	-0.475517	1.05066	0.935957	0.50535	0.069	0.57435
Carbonate Standard	2014-09-09	DGS_Carrara	Calcite	2.03	-2.31879	16.801	-0.551	23.565	0.147	-30.902	-58.388	0.061	0.0809336	0.00223519	-0.877867	-0.588553	1.06077	0.951733	0.327413	0.069	0.396413
Sample	2014-09-09	JM3318	Dolomite	3.48	-4.65843	16.868	-0.437	20.965	0.428	-58	-83.443	0.071	0.358156	0.00223984	-0.868193	-0.474782	1.05066	0.935957	0.506123	0.069	0.575123
Heated Gas	2014-09-11	HGS_ICM	CO2	2.2	5.42234	16.296	-0.843	22.806	0.13	-18.691	-45.995	0.041	0.0768184	0.00221074	-0.879033
Sample	2014-09-11	JM3705	Dolomite	2.95	-6.57488	14.268	-0.444	16.379	-0.061	-41.144	-62.793	0.068	-0.0498971	0.00223984	-0.868193	-0.475101	1.05066	0.935957	0.505327	0.069	0.574327
Carbonate Standard	2014-09-12	DGS_ETH3	Calcite	1.75	-2.04938	17.089	-0.269	24.963	0.98	-103.557	-129.204	0.176	0.885368	0.00222723	-0.87825	-0.307061	1.0618	0.951854	0.626543	0.069	0.695543
Heated Gas	2014-09-15	HGS_ICM	CO2	2.16	5.57754	16.396	-0.859	22.858	-0.126	-21.62	-49.093	0.039	-0.170325	0.00227668	-0.875898
Carbonate Standard	2014-09-16	DGS_Carrara	Calcite	2.05	-2.21295	16.904	-0.569	23.826	0.188	-31.559	-59.24	0.064	0.125253	0.00227668	-0.875898	-0.607485	1.06311	0.952438	0.306612	0.069	0.375612
Carbonate Standard	2014-09-17	DGS_ETH3	Calcite	1.71	-2.00127	17.09	-0.286	24.658	0.571	-30.177	-57.991	0.073	0.49242	0.00227668	-0.875898	-0.324908	1.06374	0.955938	0.607404	0.069	0.676404
Heated Gas	2014-09-22	HGS_HP	CO2	-36.76	-21.4469	-48.641	-0.983	-32.397	-1.058	142.581	220.082	-0.128	-0.0508034	0.00227668	-0.875898
Heated Gas	2014-09-22	HGS_ICM	CO2	2.2	6.25655	17.142	-0.847	24.462	0.089	-28.457	-57.047	0.059	0.01415	0.00227668	-0.875898
Carbonate Standard	2014-09-23	DGS_Carrara	Calcite	2.07	-2.33803	16.831	-0.536	23.73	0.343	-127.772	-152.511	0.152	0.28208	0.00228281	-0.875574	-0.574422	1.06748	0.956187	0.343004	0.069	0.412004
Carbonate Standard	2014-09-24	DGS_ETH3	Calcite	1.93	-2.059	17.259	-0.272	24.409	0.444	-112.099	-137.651	0.197	0.370159	0.00228895	-0.87525	-0.311505	1.0681	0.956935	0.62372	0.069	0.69272
Carbonate Standard	2014-09-24	DGS_ETH3	Calcite	1.87	-1.9724	17.284	-0.275	24.463	0.323	-68.981	-95.874	0.169	0.248131	0.00228895	-0.87525	-0.314562	1.0681	0.956935	0.620454	0.069	0.689454
Heated Gas	2014-09-26	HGS-HP	CO2	-36.84	-21.4663	-48.747	-0.998	-32.417	-1.041	35.503	105.869	-0.074	-0.0332422	0.00230121	-0.874602
Carbonate Standard	2014-09-29	DGS_Carrara	Calcite	2.17	-2.13597	17.116	-0.556	23.922	0.126	-32.544	-60.455	0.069	0.062672	0.00234029	-0.875255	-0.596056	1.07151	0.959411	0.320733	0.069	0.389733
Carbonate Standard	2014-10-01	DGS_ETH3	Calcite	1.76	-1.92429	17.229	-0.271	24.86	0.614	-85.007	-111.425	0.122	0.532839	0.00236634	-0.87569	-0.31177	1.07296	0.962711	0.626545	0.069	0.695545
Heated Gas	2014-10-03	HGS_HP	CO2	-36.83	-21.7088	-48.976	-0.999	-32.878	-1.032	58.625	131.103	-0.124	0.0500788	0.00239239	-0.876125
Carbonate Standard	2014-10-07	DGS_Carrara	Calcite	2.16	-1.95316	17.299	-0.562	24.621	0.439	-58.234	-85.74	0.119	0.361499	0.00233801	-0.878808	-0.602445	1.07014	0.961979	0.317276	0.069	0.386276
Carbonate Standard	2014-10-07	DGS_ETH3	Calcite	1.79	-1.90505	17.296	-0.246	24.437	0.176	-32.748	-60.726	0.057	0.10221	0.00233801	-0.878808	-0.286438	1.07014	0.961795	0.655448	0.069	0.724448
Heated Gas	2014-10-08	HGS-ICM	CO2	2.2	6.36325	17.269	-0.827	24.654	0.079	-169.813	-194.406	0.258	0.0230338	0.00232442	-0.879478
Heated Gas	2014-10-09	HGS-ICM	CO2	2.21	6.62515	17.543	-0.825	25.144	0.041	-142.742	-168.571	0.148	-0.0243245	0.00227877	-0.878708
Carbonate Standard	2014-10-10	DGS_ETH3	Calcite	1.82	-1.82807	17.392	-0.262	25.088	0.646	-93.162	-119.561	0.197	0.581768	0.00229897	-0.877723	-0.301984	1.07347	0.970623	0.640353	0.069	0.709353
Carbonate Standard	2014-10-13	DGS_Carrara	Calcite	2.14	-2.13597	17.081	-0.567	24.365	0.553	-124.437	-149.679	0.172	0.502867	0.00235957	-0.87477	-0.607304	1.08207	0.969099	0.311952	0.069	0.380952
Carbonate Standard	2014-10-17	DGS_ETH3	Calcite	1.74	-1.87618	17.235	-0.287	24.616	0.288	-11.819	-40.413	0.026	0.160624	0.00234326	-0.875722	-0.327386	1.07897	0.95449	0.613926	0.069	0.682926
Heated Gas	2014-10-28	HGS_HP	CO2	-36.78	-21.5051	-48.716	-0.991	-32.616	-1.174	57.898	129.794	-0.101	-0.236439	0.00220939	-0.882825
Carbonate Standard	2014-10-30	DGS_Carrara	Calcite	2.16	-1.92429	17.324	-0.565	24.18	-0.049	90.501	58.567	-0.116	0.0539342	0.00220773	-0.884704	-0.603247	1.05134	0.951024	0.316807	0.069	0.385807
Heated Gas	2014-11-03	HGS_ICM	CO2	-36.81	-21.5924	-48.829	-0.978	-32.629	-0.997	59.146	131.385	-0.103	-0.0472186	0.00220443	-0.888463
Carbonate Standard	2014-11-03	DGS_Carrara	Calcite	2.12	-2.12635	17.064	-0.572	24.128	0.31	-71.326	-98.093	0.055	0.27762	0.00220443	-0.888463	-0.609616	1.03983	0.944093	0.310196	0.069	0.379196
Heated Gas	2014-11-04	HGS_ICM	CO2	2.21	6.31475	17.251	-0.812	24.656	0.166	-88.534	-115.469	0.16	0.104162	0.00221452	-0.88797
Carbonate Standard	2014-11-04	DGS_ETH3	Calcite	1.75	-1.89543	17.237	-0.28	24.899	0.61	-211.428	-234.213	0.1	0.543871	0.00221452	-0.88797	-0.318172	1.04073	0.944913	0.613327	0.069	0.682327
Carbonate Standard	2014-11-05	DGS_Carrara	Calcite	2.14	-2.03975	17.17	-0.568	25.139	1.13	-446.099	-462.155	0.31	1.05963	0.00221796	-0.888024	-0.606082	1.04074	0.944609	0.313836	0.069	0.382836
Carbonate Standard	2014-11-06	DGS_ETH3	Calcite	1.68	-2.17446	16.851	-0.301	24.541	0.82	-27.286	-54.805	0.018	0.760193	0.00222141	-0.888078	-0.338433	1.04075	0.944913	0.592537	0.069	0.661537
Heated Gas	2014-11-07	HGS_ICM	CO2	2.21	6.06255	16.967	-0.829	24.452	0.48	-284.514	-305.302	0.25	0.418083	0.00222486	-0.888131
Heated Gas	2014-11-10	HGS_HP	CO2	-36.94	-21.5051	-48.858	-0.976	-32.477	-1.023	72.494	145.582	-0.128	-0.0162696	0.00222847	-0.887955
Carbonate Standard	2014-11-11	DGS_Carrara	Calcite	1.99	-2.46312	16.609	-0.55	23.539	0.408	-189.504	-212.23	0.214	0.355872	0.00222847	-0.887955	-0.587013	1.02718	0.933684	0.330719	0.069	0.399719
Heated Gas	2014-11-12	HGS_ICM	CO2	2.19	3.24952	14.042	-0.846	18.349	0.097	-84.969	-106.551	0.132	0.142978	0.00222847	-0.887955
Carbonate Standard	2014-11-13	DGS_ETH3	Calcite	1.71	-2.15522	16.966	-0.239	24.195	0.439	-123.454	-148.315	0.112	0.374472	0.00221024	-0.888794	-0.276499	1.02567	0.932073	0.649281	0.069	0.718281
Heated Gas	2014-11-14	HGS_HP	CO2	-36.82	-21.5051	-48.743	-0.973	-32.484	-1.024	162.662	241.746	-0.195	-0.0167389	0.00219201	-0.889632
Carbonate Standard	2014-11-15	DGS_Carrara	Calcite	2.21	-2.1456	17.169	-0.531	24.074	0.302	-132.696	-157.729	0.172	0.235457	0.00219201	-0.889632	-0.568635	1.02199	0.930346	0.349205	0.069	0.418205
Heated Gas	2014-11-17	HGS_ICM	CO2	2.18	3.39503	14.183	-0.842	18.471	-0.08	-92.271	-113.93	0.083	-0.040165	0.00219201	-0.889632
Heated Gas	2014-11-18	HGS_HP	CO2	-36.79	-21.3014	-48.495	-0.951	-30.865	0.227	-16.599	49.824	-0.51	1.20352	0.00219201	-0.889632
Heated Gas	2014-11-19	HGS_ICM	CO2	2.15	4.28743	14.954	-0.954	19.238	-1.095	-19.544	-44.601	-0.202	-1.06973	0.00219201	-0.889632
Note: Sample unknowns for this study are highlighted as green rows. All other rows contain data for the equilibrium reference gases used to normalize data and carbonate standards used to monitor accuracy and precision.
#WG: working gas. These are raw values relative to a Oztech reference gas with d13C = -3.61‰ (PDB) and d18O = 25.01‰ (SMOW).
§Time varying slope and intercept of the 'heated gas line' (see Huntington et al., 2009 for heated gas line description) determined from average values until 21/01/14 and from a 30-day moving average from this point forward.
*D47 values relative to the 'Ghosh' scale (Ghosh et al., 2006; described by Huntington et al., 2009)
**D47 values scaled to a 25 °C phosphoric acid reaction by addition of a 0.067‰ temperature correction factor for 90 °C reactions (Wacker et al., 2013).
@D48 values normalized to a time varying D48 heated gas line. Large values (> ±2‰) indicate potential sample contamination, or other problems during analysis.
¥Time varying slope and intercept of the 'equilibrated gas line' (see Dennis et al., 2011 for equilibrated gas line description).
&D47 values reported in the 'carbon dioxied equilibrium scale' based on theoretical equilibrium values of CO2 (see Dennis et al., 2011).
